# Supplementary material for: A double role of the Gal80 N terminus in activation of transcription by Gal4p
Source: Life Sci Alliance. 2020 Oct 9;3(12):e202000665. doi: 10.26508/lsa.202000665 (PMC7556753; doi:10.26508/lsa.202000665)
Supplement: Supplementary file 4 [file LSA-2020-00665_TableS4.docx]

**Supplementary Table S4: Overview of oligonucleotides used for KlGal80 fragment construction**

| Fragment1 | Included residues2 | Number of residues2 | First Primer3 | Second Primer3 |
| --- | --- | --- | --- | --- |
| A1 | 2-166 | 165 | GFPfw  5`-ATTACACATGGCATGGATGAA  CT-3` | A1KlG80SmiIBw  5`-ATTTAAATTGATTAACTCTTTG  GCCCG-3` |
| A2 | 2-332 | 331 | GFPfw  5`-ATTACACATGGCATGGATGAA  CT-3` | A2KlG80SmiIBw  5`-ATTTAAATGCTGCTACCGTTC  CCATTC-3` |
| A3 | 307-457 | 151 | MluIA3KlG80Fw  5`-ACGCGTGAGGGTGATGCA-3` | KlG80SmiIBw  5`-ACGTAAGCAAGCCATAACGG  ATTCC-3` |
| B1 | 151-346 | 196 | B1MluIKlG80Fw  5`-ATTATACGCGTCTCCAAGGACG  TAAAT-3` | B1SmiIKlG80BwNeu  5`-GGCGCATTTAAATCTTGTCT  TTTAT-3` |
| B2 | 167-240 | 73 | B2MluIKlG80FwNeu  5`-AATTACGCGTAGCGAAGGTTG  T-3` | B2SmiIKlG80Bw  5`-GGCGCATTTAAATAGTTGGGAT  ATTGTTTG-3` |
| B3 | 231-332 | 102 | B3MluIKlG80Fw  5`-AATATACGCGTAATGCGATGAT  CTCAAAC-3` | B3SmiIKlG80Bw  5`-AATAGATTTAAATGCTGCTACC  GTTCCCAT-3` |
| C1 | 2-39 | 38 | C1MluIKlG80Fw  5`-GCGAACGCGTAACAATAACAAA  CGGTC-3` | C1SmiIKlG80Bw  5`-GCGGATTTAAATGGCTAAGA  AATGCGT-3` |
| C2 | 34-72 | 39 | C2MluIKlG80FwNeu  5`-TAATACGCGTAAGACGCATTT  CTT-3` | C2SmiIKlG80Bw  5`-GCCGATTTAAATTAGCATGTTT  CAATTGC-3` |
| C3 | 67-104 | 37 | C3MluIKlG80FwNeu  5`-AACTACGCGTTTGCAATTGAA  AC-3` | C3SmiIKlG80Bw  5`-GCCCATTTAAATCTTGACCACC  TC-3` |
| C4 | 101-139 | 39 | C4MluIKlG80Fw  5`-TAATACGCGTGAGGTGGTCAA  GAA-3` | C4SmiIKlG80Bw  5`-GGCGATTTAAATGAGATATCGA  ATACAACT-3` |
| C5 | 134-166 | 33 | C5MluIKlG80FwNeu  5`-CAGCACGCGTGAGTTGTATT-3` | C5SmiIKlG80BwNeu  5`-CGGGATTTAAATGATTAACTCT  TTG-3` |

1The fragment IDs are identical to those in Fig. S1.

2Residues are given as positions and number of amino acids in full length KlGal80 protein (without GFP).

3Plasmid pEQRS80 (Hager, 2003) containing the reading frame for a full-length KlGal80-GFP fusion protein was used as template for PCR amplification of *KlGAL80* subfragments with the listed primer pairs. The PCR products and the pEQRS80 vector were cleaved with *Mlu*I and *Smi*I and ligated.
